# Supplementary material for: The World Health Organization Risk Drinking Levels Measure of Alcohol Consumption: Prevalence and Health Correlates in Nationally Representative Surveys of U.S. Adults, 2001–2002 and 2012–2013
Source: Atypon-hosted journal article supplement (doi:10.1176/appi.ajp.2020.20050610), 2021-01-21
Supplement: appi.ajp.2020.20050610.ds001.pdf [file appi.ajp.2020.20050610.ds001.pdf]

Data supplement for Shmulewitz et al., The World Health Organization Risk Drinking Levels Measure of Alcohol Consumption: Prevalence and Health Correlates in Nationally Representative Surveys of U.S. Adults, 2001–2002 and 2012–2013. *Am J Psychiatry* (doi: 10.1176/appi.ajp.2020.20050610)

**TABLE S1.** Definition of WHO risk drinking levels in the United States

|                | <b>Average ethanol consumed per day in the past year</b> |                         |              |                         |
|----------------|----------------------------------------------------------|-------------------------|--------------|-------------------------|
|                | <b>Men</b>                                               |                         | <b>Women</b> |                         |
|                | In grams                                                 | In U.S. standard drinks | In grams     | In U.S. standard drinks |
| Very high risk | >100                                                     | >7.1                    | >60          | >4.3                    |
| High risk      | >60 to 100                                               | >4.3 to 7.1             | >40 to 60    | >2.9 to 4.3             |
| Moderate risk  | >40 to 60                                                | >2.9 to 4.3             | >20 to 40    | >1.4 to 2.9             |
| Low risk       | 1 to 40                                                  | 1 to 2.9                | 1 to 20      | 1 to 1.4                |
